# Supplementary material for: Virtual Screening Based on QSAR and Molecular Docking of Possible Inhibitors Targeting Chagas CYP51
Source: Hindawi journal article supplement (doi:10.1155/2021/6640624), 2021-02-28
Supplement: f1 [file 6640624.f1.docx]

Table S1. Regression models

| Model | Regression equation |
| --- | --- |
| 01.20 | pIC50 = -1,952 +0.218(logP(o/w)) + 0.095(Length) + 0.005(Weight) |
| 01.19 | pIC50 = -1.237 + 0.164(logP(o/w)) +0.103(Length)+ 0.004(Weight))-2.551( Q_VSA_FPPOS) |
| 01.18 | pIC50 = -0.185 + 0.246(logP(o/w)) +0.136(Length)+ 0.004(Weight) -0.004(Q_VSA_HYD)-4.156(Q_VSA_FPPOS) |
| 01.17 | pIC50 = -0.810 + 0.321(logP(o/w)) +0.173(Length) + 0.008(Weight) -0.312(SMR) |
| 01.16 | pIC50 = -0.661 + 0.328(logP(o/w)) +0.166(Length) + 0.008(Weight) -0.216(SMR)-0.004(Vol) |
| 01.15 | pIC50 = 1.181 + 0.233(logP(o/w)) + 0.200(Length) -0.139(SMR)-3.186(Q_VSA_FPPOS) |
| 01.14 | pIC50 = -1.757 + 0.311(logP(o/w)) +0.228(Length) + 0.010(Weigth) -0.001(Pmi) -0.291(SMR) |
| 01.13 | pIC50 = -0.452 + 0.218(logP(o/w)) +0.170(Length) + 0.013(Weigth) -0.004(ASA_P) -0.447(SMR) |
| 01.12 | pIC50 = -0.024 + 0.212(logP(o/w)) +0.179(Length) + 0.012(Weigth) -0.003(ASA_P)-1.545(Q_VSA_FPPOS) -0.438(SMR) |
| 01.11 | pIC50 = -0.513 + 0.213(logP(o/w)) +0.174(Length) + 0.013(Weigth) +0.013(apol)-0.004(ASA_P) -0.519(SMR) |
| 01.10 | pIC50 = -1.206 + 0.232(logP(o/w)) +0.158(Length) + 0.011(Weigth) -0.003(ASA_H) -0.519(SMR) |
| 01.9 | pIC50 = -0.499 + 0.215(logP(o/w)) +0.172(Length) + 0.012(Weigth) +0.001(VSA) -0.004(ASA_P) -0.473(SMR) |
| 01.8 | pIC50 = -0.242 + 0.225(logP(o/w)) +0.174(Length) + 0.012(Weigth) -0.407(SMR)-0.004(ASA_P)-0.001(ASA) |
| 01.7 | pIC50 = -0.173 + 0.330(logP(o/w)) +0.185(Length) + 0.008(Weigth) -0.003(ASA) -0.214(SMR) |
| 01.6 | pIC50 = -3.587+0.490(ASA-P) +0.384(Length) + 0.009(Weigth) + 0.008(logP(o/w)) -0.010(SMR) |
| 01.5 | pIC50 = -0.456 + 0.218(logP(o/w)) +0.170(Length) + 0.013(Weigth) +0.001(std_dim1) -0.004(ASA-P) -0.447(SMR) |
| 01.4 | pIC50 = -0.567 + 0.220(logP(o/w)) +0.173(Length)+ 0.012(Weigth) +0.001(Q_VSA_NEG) -0.004(ASA-P) -0.440(SMR) |
| 01.3 | pIC50 = -0.386 + 0.217(logP(o/w)) +0.185(Length)+ 0.012(Weigth) -0.004(ASA-P)-0.393(Q_VSA_FPOL) -0.448(SMR) |
| 01.2 | pIC50 = -0.797 + 0.321(logP(o/w)) +0.175(Length) + 0.008(Weigth) -0.072(Q_VSA_FPPOS) -0.312(SMR) |
| 01.1 | pIC50 = 0.679 + 0.208(logP(o/w)) +0.168(Length) -2.918(Q_VSA_FPPOS) -0.002(Vol) |
| 01 | pIC50 = 0.159+ 0.186(logP(o/w)) +0.150(Length) -2.809(Q_VSA_FPPOS) |

Table S2. Statistics of regression models

| Model | Multiple correlation coeficcient | Coefficient R2 | Adjusted R2 | SE |
| --- | --- | --- | --- | --- |
| 01.20 | 0.768 | 0.590 | 0.564 | 0.365 |
| 01.19 | 0.781 | 0.610 | 0.577 | 0.359 |
| 01.18 | 0.794 | 0.630 | 0.590 | 0.354 |
| 01.17 | 0.804 | 0.647 | 0.617 | 0.342 |
| 01.16 | 0.806 | 0.650 | 0.612 | 0.344 |
| 01.15 | 0.764 | 0.583 | 0.548 | 0.372 |
| 01.14 | 0.815 | 0.664 | 0.627 | 0.337 |
| 01.13 | 0.836 | 0.700 | 0.667 | 0.319 |
| 01.12 | 0.840 | 0.705 | 0.666 | 0.319 |
| 01.11 | 0.837 | 0.701 | 0.661 | 0.322 |
| 01.10 | 0.824 | 0.678 | 0.643 | 0.330 |
| 01.9 | 0.837 | 0.700 | 0.660 | 0.322 |
| 01.8 | 0.837 | 0.701 | 0.661 | 0.322 |
| 01.7 | 0.810 | 0.655 | 0.618 | 0.342 |
| 01.6 | 0.818 | 0.669 | 0.633 | 0.659 |
| 01.5 | 0.836 | 0.700 | 0.660 | 0.322 |
| 01.4 | 0.837 | 0.700 | 0.660 | 0.322 |
| 01.3 | 0.838 | 0.702 | 0.662 | 0.321 |
| 01.2 | 0.804 | 0.647 | 0.608 | 0.346 |
| 01.1 | 0.756 | 0.572 | 0.535 | 0.377 |
| 01 | 0.754 | 0.568 | 0.541 | 0.374 |

Table S3. LOO cross-validation statistics for model 02

| LOO-Molecule | Intercept | LogP(o/w) | Q_VSA_FPPOS | Length | Multiple correlation coefficient | Coefficient R2 | Adjusted R2 | SE |
| --- | --- | --- | --- | --- | --- | --- | --- | --- |
| 03 | -0.21 | 0.27 | -3.22 | 0.17 | 0.90 | 0.82 | 0.80 | 0.26 |
| 04 | -0.17 | 0.27 | -3.32 | 0.17 | 0.90 | 0.82 | 0.80 | 0.26 |
| 05 | -0.21 | 0.27 | -3.23 | 0.17 | 0.91 | 0.82 | 0.81 | 0.25 |
| 06 | -0.17 | 0.27 | -3.43 | 0.17 | 0.91 | 0.83 | 0.81 | 0.25 |
| 07 | -0.17 | 0.27 | -3.32 | 0.17 | 0.90 | 0.82 | 0.80 | 0.26 |
| 08 | -0.17 | 0.27 | -3.31 | 0.17 | 0.90 | 0.82 | 0.80 | 0.26 |
| 09 | -0.17 | 0.27 | -3.32 | 0.17 | 0.90 | 0.82 | 0.80 | 0.26 |
| 12 | -0.17 | 0.27 | -3.31 | 0.17 | 0.90 | 0.82 | 0.80 | 0.26 |
| 13 | -0.16 | 0.27 | -3.36 | 0.17 | 0.90 | 0.81 | 0.80 | 0.26 |
| 14 | -0.09 | 0.27 | -3.40 | 0.16 | 0.90 | 0.81 | 0.80 | 0.26 |
| 15 | -0.14 | 0.26 | -3.26 | 0.17 | 0.91 | 0.83 | 0.82 | 0.24 |
| 16 | -0.18 | 0.26 | -3.19 | 0.17 | 0.90 | 0.81 | 0.80 | 0.26 |
| 17 | -0.21 | 0.25 | -3.09 | 0.18 | 0.91 | 0.83 | 0.82 | 0.24 |
| 18 | -0.29 | 0.28 | -2.81 | 0.16 | 0.91 | 0.82 | 0.81 | 0.25 |
| 19 | -0.29 | 0.28 | -2.84 | 0.17 | 0.91 | 0.83 | 0.81 | 0.25 |
| 20 | -0.21 | 0.27 | -3.11 | 0.17 | 0.90 | 0.82 | 0.80 | 0.26 |
| 21 | -0.15 | 0.26 | -3.66 | 0.18 | 0.91 | 0.82 | 0.81 | 0.25 |
| 22 | -0.20 | 0.27 | -3.26 | 0.17 | 0.91 | 0.82 | 0.81 | 0.26 |
| 23 | -0.12 | 0.27 | -3.53 | 0.17 | 0.91 | 0.82 | 0.81 | 0.26 |
| 26 | -0.22 | 0.27 | -3.13 | 0.17 | 0.90 | 0.82 | 0.80 | 0.26 |
| 28 | -0.29 | 0.28 | -3.12 | 0.17 | 0.91 | 0.82 | 0.81 | 0.25 |
| 29 | -0.13 | 0.27 | -3.39 | 0.17 | 0.90 | 0.81 | 0.80 | 0.26 |
| 30 | -0.20 | 0.28 | -3.27 | 0.17 | 0.90 | 0.80 | 0.79 | 0.26 |
| 31 | -0.14 | 0.26 | -3.26 | 0.17 | 0.89 | 0.79 | 0.78 | 0.26 |
| 32 | -0.10 | 0.25 | -3.39 | 0.17 | 0.89 | 0.79 | 0.78 | 0.26 |
| 33 | -0.13 | 0.27 | -3.34 | 0.16 | 0.90 | 0.81 | 0.79 | 0.26 |
| 34 | -0.14 | 0.27 | -3.26 | 0.16 | 0.90 | 0.81 | 0.80 | 0.26 |
| 35 | -0.27 | 0.26 | -3.30 | 0.18 | 0.90 | 0.81 | 0.80 | 0.26 |
| 36 | -0.18 | 0.27 | -3.30 | 0.17 | 0.90 | 0.81 | 0.80 | 0.26 |
| 37 | -0.16 | 0.27 | -3.30 | 0.17 | 0.90 | 0.81 | 0.80 | 0.26 |
| 38 | -0.11 | 0.26 | -3.50 | 0.17 | 0.90 | 0.81 | 0.80 | 0.26 |
| 39 | -0.16 | 0.27 | -3.34 | 0.17 | 0.90 | 0.82 | 0.80 | 0.26 |
| 40 | -0.17 | 0.27 | -3.32 | 0.17 | 0.90 | 0.82 | 0.80 | 0.26 |
| 41 | -0.19 | 0.27 | -3.29 | 0.17 | 0.90 | 0.82 | 0.80 | 0.26 |
| 42 | -0.11 | 0.27 | -3.54 | 0.17 | 0.91 | 0.83 | 0.81 | 0.25 |
| 43 | -0.17 | 0.27 | -3.32 | 0.17 | 0.90 | 0.82 | 0.80 | 0.26 |
| 44 | -0.17 | 0.27 | -3.32 | 0.17 | 0.90 | 0.82 | 0.80 | 0.26 |
| 46 | 0.02 | 0.25 | -4.32 | 0.17 | 0.91 | 0.82 | 0.81 | 0.25 |
| 47 | -0.23 | 0.28 | -3.14 | 0.17 | 0.91 | 0.82 | 0.81 | 0.25 |
| 48 | -0.17 | 0.28 | -3.22 | 0.16 | 0.91 | 0.82 | 0.81 | 0.26 |
| 49 | 0.00 | 0.28 | -3.77 | 0.16 | 0.91 | 0.83 | 0.82 | 0.25 |
| 50 | -0.13 | 0.27 | -3.51 | 0.17 | 0.91 | 0.82 | 0.81 | 0.26 |
| 51 | -0.18 | 0.28 | -3.15 | 0.16 | 0.91 | 0.82 | 0.81 | 0.26 |
